# Supplementary material for: Acute TBK1/IKK-ε Inhibition Enhances the Generation of Disease-Associated Microglia-Like Phenotype Upon Cortical Stab-Wound Injury
Source: Front Aging Neurosci. 2021 Jul 13;13:684171. doi: 10.3389/fnagi.2021.684171 (PMC8313992; doi:10.3389/fnagi.2021.684171)
Supplement: Supplementary Table 5 — Detailed statistics for the experiments depicted in Figure 3. [file Table_5.xlsx]

## Sheet: Sheet1
Table S5. Results from multiple comparison post-hoc tests
Figure 3A,C: CD317
Ordinary one-way ANOVA
ANOVA summary	F	22.27
	P value	0.0003
	P value summary	***
	Significant diff. among means (P < 0.05)?	YES
	R squared	0.8931
ANOVA Table	Treatment (between columns)	SS	DF	MS	F(DFn, DFd)		P value
		7623	3	2541	F (3, 8) = 22.27		P=0.0013
	Residual (within columns)	912.7	8	114.1
	Total	8536	11
Multiple Comparisons	Tukey's multiple comparisons test	Mean Diff.		95.00% CI of diff.		Below threshold?		Summary
	VH Sham vs. VH SW	-29		-56.93 to -1.072			Yes	*
	VH Sham vs. AMX Sham	-1.667		-29.59 to 26.26			No	ns
	VH Sham vs. AMX SW	-62		-89.93 to -34.07			Yes	***
	VH SW vs. AMX Sham	27.33		-0.5943 to 55.26			No	ns
	VH SW vs. AMX SW	-33		-60.93 to -5.072			Yes	*
	AMX Sham vs. AMX SW	-60.33		-88.26 to -32.41			Yes	***
Figure 3B,D: CD68
Ordinary one-way ANOVA
ANOVA summary	F	61.72
	P value	<0.0001
	P value summary	****
	Significant diff. among means (P < 0.05)?	Yes
	R squared	0.9586
ANOVA Table	Treatment (between columns)	SS	DF	MS	F(DFn, DFd)		P value
		10971	3	3657	F (3, 8) = 61.72		P<0.0001
	Residual (within columns)	474	8	59.25
	Total	11445	11
Multiple Comparisons	Tukey's multiple comparisons test	Mean Diff.	95.00% CI of diff.	Below threshold?	Summary	Adjusted P value
	VH Sham vs. VH SW	-41	-61.13 to -20.87	Yes	***	0.0008
	VH Sham vs. AMX Sham	-1.333	-21.46 to 18.79	No	ns	0.9963
	VH Sham vs. AMX SW	-72.67	-92.79 to -52.54	Yes	****	<0.0001
	VH SW vs. AMX Sham	39.67	19.54 to 59.79	Yes	**	0.001
	VH SW vs. AMX SW	-31.67	-51.79 to -11.54	Yes	**	0.0044
	AMX Sham vs. AMX SW	-71.33	-91.46 to -51.21	Yes	****	<0.0001
