# Supplementary material for: Acute TBK1/IKK-ε Inhibition Enhances the Generation of Disease-Associated Microglia-Like Phenotype Upon Cortical Stab-Wound Injury
Source: Front Aging Neurosci. 2021 Jul 13;13:684171. doi: 10.3389/fnagi.2021.684171 (PMC8313992; doi:10.3389/fnagi.2021.684171)
Supplement: Supplementary Table 6 — Detailed statistics for the experiments depicted in Figure 4. [file Table_6.xlsx]

## Sheet: Sheet1
Table S6. Results from multiple comparison post-hoc tests
Figure 4A, B: CD45
Ordinary one-way ANOVA
ANOVA summary	F	111.3
	P value	<0.0001
	P value summary	****
	Significant diff. among means (P < 0.05)?	Yes
	R squared	0.9766
ANOVA Table	Treatment (between columns)	SS	DF	MS	F(DFn, DFd)	P value
		1503	3	501	F (3, 8) = 111.3	P<0.0001
	Residual (within columns)	36	8	4.5
	Total	1539	11
Multiple Comparisons	Tukey's multiple comparisons test	Mean Diff.	95.00% CI of diff.	Below threshold?	Summary	Adjusted P value
	VH Sham vs. VH SW	-14	-19.55 to -8.453	Yes	***	0.0002
	VH Sham vs. AMX Sham	-1.333	-6.880 to 4.213	No	ns	0.8659
	VH Sham vs. AMX SW	-27.67	-33.21 to -22.12	Yes	****	<0.0001
	VH SW vs. AMX Sham	12.67	7.120 to 18.21	Yes	***	0.0004
	VH SW vs. AMX SW	-13.67	-19.21 to -8.120	Yes	***	0.0002
	AMX Sham vs. AMX SW	-26.33	-31.88 to -20.79	Yes	****	<0.0001
Figure 4A, B: CD3
Ordinary one-way ANOVA
ANOVA summary	F	131.7
	P value	<0.0001
	P value summary	****
	Significant diff. among means (P < 0.05)?	Yes
	R squared	0.9801
ANOVA Table	Treatment (between columns)	SS	DF	MS	F(DFn, DFd)	P value
		1350	3	449.9	F (3, 8) = 131.7	P<0.0001
	Residual (within columns)	27.33	8	3.417
	Total	1377	11
Multiple Comparisons	Tukey's multiple comparisons test	Mean Diff.	95.00% CI of diff.	Below threshold?	Summary	Adjusted P value
	VH Sham vs. VH SW	-11.33	-16.17 to -6.500	Yes	***	0.0003
	VH Sham vs. AMX Sham	-0.3333	-5.166 to 4.500	No	ns	0.9959
	VH Sham vs. AMX SW	-26	-30.83 to -21.17	Yes	****	<0.0001
	VH SW vs. AMX Sham	11	6.167 to 15.83	Yes	***	0.0004
	VH SW vs. AMX SW	-14.67	-19.50 to -9.834	Yes	****	<0.0001
	AMX Sham vs. AMX SW	-25.67	-30.50 to -20.83	Yes	****	<0.0001
