# Supplementary material for: Acute TBK1/IKK-ε Inhibition Enhances the Generation of Disease-Associated Microglia-Like Phenotype Upon Cortical Stab-Wound Injury
Source: Front Aging Neurosci. 2021 Jul 13;13:684171. doi: 10.3389/fnagi.2021.684171 (PMC8313992; doi:10.3389/fnagi.2021.684171)
Supplement: Supplementary Table 7 — Detailed statistics for the experiments depicted in Figure 5. [file Table_7.xlsx]

## Sheet: Sheet1
Table S7. Results from multiple comparison post-hoc tests
Figure 5
Ordinary one-way ANOVA
Cst7
ANOVA summary	F	27.14
	P value	<0.0001
	P value summary	****
	Significant diff. among means (P < 0.05)?	Yes
	R squared	0.8358
ANOVA Table	Treatment (between columns)	SS	DF	MS	F(DFn, DFd)	P value
		0.0005436	3	0.0001812	F (3, 16) = 27.14	P<0.0001
	Residual (within columns)	0.0001068	16	6.677e-06
	Total	0.0006505	19
Multiple Comparisons	Tukey's multiple comparisons test	Mean Diff.	95.00% CI of diff.	Below threshold?	Summary	Adjusted P value
	VH Sham vs. VH SW	-0.00707	-0.01175 to -0.002394	Yes	**	0.0026
	VH Sham vs. AMX Sham	-0.001454	-0.006130 to 0.003222	No	ns	0.8103
	VH Sham vs. AMX SW	-0.01322	-0.01790 to -0.008548	Yes	****	<0.0001
	VH SW vs. AMX Sham	0.005616	0.0009402 to 0.01029	Yes	*	0.0161
	VH SW vs. AMX SW	-0.006154	-0.01083 to -0.001478	Yes	**	0.0083
	AMX Sham vs. AMX SW	-0.01177	-0.01645 to -0.007094	Yes	****	<0.0001
LPL
ANOVA summary	F	7.103
	P value	0.003
	P value summary	**
	Significant diff. among means (P < 0.05)?	Yes
	R squared	0.5712
ANOVA Table	Treatment (between columns)	SS	DF	MS	F(DFn, DFd)	P value
		0.0002748	3	9.159e-05	F (3, 16) = 7.103	P=0.0030
	Residual (within columns)	0.0002063	16	1.289e-05
	Total	0.0004811	19
Multiple Comparisons	Tukey's multiple comparisons test	Mean Diff.	95.00% CI of diff.	Below threshold?	Summary	Adjusted P value
	VH Sham vs. VH SW	-0.005667	-0.01216 to 0.0008311	No	ns	0.0989
	VH Sham vs. AMX Sham	-0.001885	-0.008382 to 0.004613	No	ns	0.8396
	VH Sham vs. AMX SW	-0.009663	-0.01616 to -0.003166	Yes	**	0.003
	VH SW vs. AMX Sham	0.003782	-0.002716 to 0.01028	No	ns	0.3728
	VH SW vs. AMX SW	-0.003997	-0.01049 to 0.002501	No	ns	0.3273
	AMX Sham vs. AMX SW	-0.007779	-0.01428 to -0.001281	Yes	*	0.0164
Clec7
ANOVA summary	F	19.74
	P value	<0.0001
	P value summary	****
	Significant diff. among means (P < 0.05)?	Yes
	R squared	0.7873
ANOVA Table	Treatment (between columns)	SS	DF	MS	F(DFn, DFd)	P value
		2.884e-06	3	9.614e-07	F (3, 16) = 19.74	P<0.0001
	Residual (within columns)	7.792e-07	16	4.87e-08
	Total	3.664e-06	19
Multiple Comparisons	Tukey's multiple comparisons test	Mean Diff.	95.00% CI of diff.	Below threshold?	Summary	Adjusted P value
	VH Sham vs. VH SW	-0.0007546	-0.001154 to -0.0003553	Yes	***	0.0003
	VH Sham vs. AMX Sham	-0.000119	-0.0005183 to 0.0002803	No	ns	0.8286
	VH Sham vs. AMX SW	-0.0008658	-0.001265 to -0.0004665	Yes	****	<0.0001
	VH SW vs. AMX Sham	0.0006356	0.0002363 to 0.001035	Yes	**	0.0017
	VH SW vs. AMX SW	-0.0001112	-0.0005105 to 0.0002881	No	ns	0.855
	AMX Sham vs. AMX SW	-0.0007468	-0.001146 to -0.0003475	Yes	***	0.0003
CCL4
ANOVA summary	F	136.7
	P value	<0.0001
	P value summary	****
	Significant diff. among means (P < 0.05)?	Yes
	R squared	0.9535
ANOVA Table	Treatment (between columns)	SS	DF	MS	F(DFn, DFd)	P value
		1.34e-06	3	4.465e-07	F (3, 20) = 136.7	P<0.0001
	Residual (within columns)	6.532e-08	20	3.266e-09
	Total	1.405e-06	23
Multiple Comparisons	Tukey's multiple comparisons test	Mean Diff.	95.00% CI of diff.	Below threshold?	Summary	Adjusted P value
	VH Sham vs. VH SW	-0.0003517	-0.0004441 to -0.0002594	Yes	****	<0.0001
	VH Sham vs. AMX Sham	5.733e-06	-8.662e-005 to 9.808e-005	No	ns	0.9981
	VH Sham vs. AMX SW	-0.0005465	-0.0006388 to -0.0004542	Yes	****	<0.0001
	VH SW vs. AMX Sham	0.0003575	0.0002651 to 0.0004498	Yes	****	<0.0001
	VH SW vs. AMX SW	-0.0001948	-0.0002871 to -0.0001024	Yes	****	<0.0001
	AMX Sham vs. AMX SW	-0.0005522	-0.0006446 to -0.0004599	Yes	****	<0.0001
CCL3
ANOVA summary	F	54.64
	P value	<0.0001
	P value summary	****
	Significant diff. among means (P < 0.05)?	Yes
	R squared	0.8913
ANOVA Table	Treatment (between columns)	SS	DF	MS	F(DFn, DFd)	P value
		3.917e-06	3	1.306e-06	F (3, 20) = 54.64	P<0.0001
	Residual (within columns)	4.78e-07	20	2.39e-08
	Total	4.395e-06	23
Multiple Comparisons	Tukey's multiple comparisons test	Mean Diff.	95.00% CI of diff.	Below threshold?	Summary	Adjusted P value
	VH Sham vs. VH SW	-0.0009062	-0.001156 to -0.0006564	Yes	****	<0.0001
	VH Sham vs. AMX Sham	4.402e-05	-0.0002058 to 0.0002938	No	ns	0.9597
	VH Sham vs. AMX SW	-0.000609	-0.0008588 to -0.0003591	Yes	****	<0.0001
	VH SW vs. AMX Sham	0.0009502	0.0007004 to 0.001200	Yes	****	<0.0001
	VH SW vs. AMX SW	0.0002972	4.742e-005 to 0.0005470	Yes	*	0.0162
	AMX Sham vs. AMX SW	-0.000653	-0.0009028 to -0.0004032	Yes	****	<0.0001
Progranulin
ANOVA summary	F	20.76
	P value	<0.0001
	P value summary	****
	Significant diff. among means (P < 0.05)?	Yes
	R squared	0.757
ANOVA Table	Treatment (between columns)	SS	DF	MS	F(DFn, DFd)	P value
		0.0007149	3	0.0002383	F (3, 20) = 20.76	P<0.0001
	Residual (within columns)	0.0002295	20	1.148e-05
	Total	0.0009445	23
Multiple Comparisons	Tukey's multiple comparisons test	Mean Diff.	95.00% CI of diff.	Below threshold?	Summary	Adjusted P value
	VH Sham vs. VH SW	-0.006199	-0.01167 to -0.0007240	Yes	*	0.023
	VH Sham vs. AMX Sham	0.001325	-0.004150 to 0.006800	No	ns	0.9044
	VH Sham vs. AMX SW	-0.01239	-0.01786 to -0.006914	Yes	****	<0.0001
	VH SW vs. AMX Sham	0.007524	0.002049 to 0.01300	Yes	**	0.0051
	VH SW vs. AMX SW	-0.00619	-0.01166 to -0.0007150	Yes	*	0.0232
	AMX Sham vs. AMX SW	-0.01371	-0.01919 to -0.008239	Yes	****	<0.0001
CSF1
ANOVA summary	F	238.4
	P value	<0.0001
	P value summary	****
	Significant diff. among means (P < 0.05)?	Yes
	R squared	0.9728
ANOVA Table	Treatment (between columns)	SS	DF	MS	F(DFn, DFd)	P value
		3.63e-06	3	1.21e-06	F (3, 20) = 238.4	P<0.0001
	Residual (within columns)	1.015e-07	20	5.076e-09
	Total	3.732e-06	23
Multiple Comparisons	Tukey's multiple comparisons test	Mean Diff.	95.00% CI of diff.	Below threshold?	Summary	Adjusted P value
	VH Sham vs. VH SW	-0.0001022	-0.0002173 to 1.296e-005	No	ns	0.0933
	VH Sham vs. AMX Sham	-0.0008962	-0.001011 to -0.0007811	Yes	****	<0.0001
	VH Sham vs. AMX SW	-0.0007388	-0.0008539 to -0.0006237	Yes	****	<0.0001
	VH SW vs. AMX Sham	-0.0007941	-0.0009092 to -0.0006789	Yes	****	<0.0001
	VH SW vs. AMX SW	-0.0006366	-0.0007518 to -0.0005215	Yes	****	<0.0001
	AMX Sham vs. AMX SW	0.0001574	4.229e-005 to 0.0002725	Yes	**	0.0054
TLR4
ANOVA summary	F	16.8
	P value	<0.0001
	P value summary	****
	Significant diff. among means (P < 0.05)?	Yes
	R squared	0.716
ANOVA Table	Treatment (between columns)	SS	DF	MS	F(DFn, DFd)	P value
		4.098e-06	3	1.366e-06	F (3, 20) = 16.80	P<0.0001
	Residual (within columns)	1.626e-06	20	8.129e-08
	Total	5.724e-06	23
Multiple Comparisons	Tukey's multiple comparisons test	Mean Diff.	95.00% CI of diff.	Below threshold?	Summary	Adjusted P value
	VH Sham vs. VH SW	-0.0004263	-0.0008870 to 3.447e-005	No	ns	0.0761
	VH Sham vs. AMX Sham	-0.0001125	-0.0005732 to 0.0003483	No	ns	0.9023
	VH Sham vs. AMX SW	-0.001063	-0.001524 to -0.0006023	Yes	****	<0.0001
	VH SW vs. AMX Sham	0.0003138	-0.0001469 to 0.0007746	No	ns	0.257
	VH SW vs. AMX SW	-0.0006368	-0.001098 to -0.0001760	Yes	**	0.0049
	AMX Sham vs. AMX SW	-0.0009506	-0.001411 to -0.0004899	Yes	****	<0.0001
IL 13
ANOVA summary	F	6.769
	P value	0.0025
	P value summary	**
	Significant diff. among means (P < 0.05)?	Yes
	R squared	0.5038
ANOVA Table	Treatment (between columns)	SS	DF	MS	F(DFn, DFd)	P value
		3.944e-09	3	1.315e-09	F (3, 20) = 6.769	P=0.0025
	Residual (within columns)	3.884e-09	20	1.942e-10
	Total	7.828e-09	23
Multiple Comparisons	Tukey's multiple comparisons test	Mean Diff.	95.00% CI of diff.	Below threshold?	Summary	Adjusted P value
	VH Sham vs. VH SW	-4.867e-06	-2.739e-005 to 1.765e-005	No	ns	0.9293
	VH Sham vs. AMX Sham	-2.582e-05	-4.834e-005 to -3.297e-006	Yes	*	0.0211
	VH Sham vs. AMX SW	-2.958e-05	-5.210e-005 to -7.063e-006	Yes	**	0.0075
	VH SW vs. AMX Sham	-2.095e-05	-4.347e-005 to 1.570e-006	No	ns	0.074
	VH SW vs. AMX SW	-2.472e-05	-4.724e-005 to -2.197e-006	Yes	*	0.0283
	AMX Sham vs. AMX SW	-3.767e-06	-2.629e-005 to 1.875e-005	No	ns	0.9652
TREM2
ANOVA summary	F	17.83
	P value	<0.0001
	P value summary	****
	Significant diff. among means (P < 0.05)?	Yes
	R squared	0.7698
ANOVA Table	Treatment (between columns)	SS	DF	MS	F(DFn, DFd)	P value
		7.773e-05	3	2.591e-05	F (3, 16) = 17.83	P<0.0001
	Residual (within columns)	2.325e-05	16	1.453e-06
	Total	0.000101	19
Multiple Comparisons	Tukey's multiple comparisons test	Mean Diff.	95.00% CI of diff.	Below threshold?	Summary	Adjusted P value
	VH Sham vs. VH SW	-0.003064	-0.005245 to -0.0008830	Yes	**	0.0049
	VH Sham vs. AMX Sham	-0.0003737	-0.002555 to 0.001807	No	ns	0.9602
	VH Sham vs. AMX SW	-0.004789	-0.006971 to -0.002608	Yes	****	<0.0001
	VH SW vs. AMX Sham	0.00269	0.0005093 to 0.004872	Yes	*	0.0133
	VH SW vs. AMX SW	-0.001725	-0.003906 to 0.0004559	No	ns	0.1487
	AMX Sham vs. AMX SW	-0.004416	-0.006597 to -0.002235	Yes	***	0.0001
FLT3L
ANOVA summary	F	33.19
	P value	<0.0001
	P value summary	****
	Significant diff. among means (P < 0.05)?	Yes
	R squared	0.8327
ANOVA Table	Treatment (between columns)	SS	DF	MS	F(DFn, DFd)	P value
		9.39e-08	3	3.13e-08	F (3, 20) = 33.19	P<0.0001
	Residual (within columns)	1.886e-08	20	9.431e-10
	Total	1.128e-07	23
Multiple Comparisons	Tukey's multiple comparisons test	Mean Diff.	95.00% CI of diff.	Below threshold?	Summary	Adjusted P value
	VH Sham vs. VH SW	-6.017e-06	-5.564e-005 to 4.361e-005	No	ns	0.9861
	VH Sham vs. AMX Sham	-0.0001442	-0.0001938 to -9.459e-005	Yes	****	<0.0001
	VH Sham vs. AMX SW	-0.0001059	-0.0001555 to -5.629e-005	Yes	****	<0.0001
	VH SW vs. AMX Sham	-0.0001382	-0.0001878 to -8.857e-005	Yes	****	<0.0001
	VH SW vs. AMX SW	-9.99e-05	-0.0001495 to -5.027e-005	Yes	****	<0.0001
	AMX Sham vs. AMX SW	3.83e-05	-1.133e-005 to 8.793e-005	No	ns	0.1688
FLT3R
ANOVA summary	F	28.01
	P value	<0.0001
	P value summary	****
	Significant diff. among means (P < 0.05)?	Yes
	R squared	0.8077
ANOVA Table	Treatment (between columns)	SS	DF	MS	F(DFn, DFd)	P value
		2.445e-05	3	8.15e-06	F (3, 20) = 28.01	P<0.0001
	Residual (within columns)	5.82e-06	20	2.91e-07
	Total	3.027e-05	23
Multiple Comparisons	Tukey's multiple comparisons test	Mean Diff.	95.00% CI of diff.	Below threshold?	Summary	Adjusted P value
	VH Sham vs. VH SW	0.0002031	-0.0006686 to 0.001075	No	ns	0.9135
	VH Sham vs. AMX Sham	-0.001491	-0.002363 to -0.0006194	Yes	***	0.0006
	VH Sham vs. AMX SW	-0.002204	-0.003076 to -0.001333	Yes	****	<0.0001
	VH SW vs. AMX Sham	-0.001694	-0.002566 to -0.0008225	Yes	***	0.0001
	VH SW vs. AMX SW	-0.002408	-0.003279 to -0.001536	Yes	****	<0.0001
	AMX Sham vs. AMX SW	-0.0007133	-0.001585 to 0.0001585	No	ns	0.134
CX3CR1
ANOVA summary	F	9.177
	P value	0.0009
	P value summary	***
	Significant diff. among means (P < 0.05)?	Yes
	R squared	0.6324
ANOVA Table	Treatment (between columns)	SS	DF	MS	F(DFn, DFd)	P value
		0.02153	3	0.007177	F (3, 16) = 9.177	P=0.0009
	Residual (within columns)	0.01251	16	0.000782
	Total	0.03404	19
Multiple Comparisons	Tukey's multiple comparisons test	Mean Diff.	95.00% CI of diff.	Below threshold?	Summary	Adjusted P value
	VH Sham vs. VH SW	-0.06772	-0.1183 to -0.01712	Yes	**	0.0073
	VH Sham vs. AMX Sham	0.0132	-0.03740 to 0.06381	No	ns	0.8768
	VH Sham vs. AMX SW	-0.04491	-0.09551 to 0.005688	No	ns	0.0913
	VH SW vs. AMX Sham	0.08092	0.03032 to 0.1315	Yes	**	0.0016
	VH SW vs. AMX SW	0.02281	-0.02779 to 0.07341	No	ns	0.5823
	AMX Sham vs. AMX SW	-0.05812	-0.1087 to -0.007517	Yes	*	0.0217
p2ry12
ANOVA summary	F	19.3
	P value	<0.0001
	P value summary	****
	Significant diff. among means (P < 0.05)?	Yes
	R squared	0.7835
ANOVA Table	Treatment (between columns)	SS	DF	MS	F(DFn, DFd)	P value
		0.0003107	3	0.0001036	F (3, 16) = 19.30	P<0.0001
	Residual (within columns)	8.585e-05	16	5.366e-06
	Total	0.0003965	19
Multiple Comparisons	Tukey's multiple comparisons test	Mean Diff.	95.00% CI of diff.	Below threshold?	Summary	Adjusted P value
	VH Sham vs. VH SW	-0.008432	-0.01262 to -0.004241	Yes	***	0.0002
	VH Sham vs. AMX Sham	0.002075	-0.002117 to 0.006266	No	ns	0.5079
	VH Sham vs. AMX SW	-0.002633	-0.006825 to 0.001558	No	ns	0.3103
	VH SW vs. AMX Sham	0.01051	0.006315 to 0.01470	Yes	****	<0.0001
	VH SW vs. AMX SW	0.005799	0.001608 to 0.009991	Yes	**	0.0056
	AMX Sham vs. AMX SW	-0.004708	-0.008899 to -0.0005161	Yes	*	0.0251
TMEM119
ANOVA summary	F	7.713
	P value	0.0013
	P value summary	**
	Significant diff. among means (P < 0.05)?	Yes
	R squared	0.5364
ANOVA Table	Treatment (between columns)	SS	DF	MS	F(DFn, DFd)	P value
		0.0003446	3	0.0001149	F (3, 20) = 7.713	P=0.0013
	Residual (within columns)	0.0002979	20	1.489e-05
	Total	0.0006425	23
Multiple Comparisons	Tukey's multiple comparisons test	Mean Diff.	95.00% CI of diff.	Below threshold?	Summary	Adjusted P value
	VH Sham vs. VH SW	-0.008112	-0.01435 to -0.001876	Yes	**	0.0081
	VH Sham vs. AMX Sham	0.001924	-0.004312 to 0.008161	No	ns	0.8234
	VH Sham vs. AMX SW	-0.001102	-0.007338 to 0.005135	No	ns	0.9594
	VH SW vs. AMX Sham	0.01004	0.003800 to 0.01627	Yes	**	0.0011
	VH SW vs. AMX SW	0.007011	0.0007742 to 0.01325	Yes	*	0.0241
	AMX Sham vs. AMX SW	-0.003026	-0.009262 to 0.003211	No	ns	0.5388
CSF1R
ANOVA summary	F	99.47
	P value	<0.0001
	P value summary	****
	Significant diff. among means (P < 0.05)?	Yes
	R squared	0.9372
ANOVA Table	Treatment (between columns)	SS	DF	MS	F(DFn, DFd)	P value
		7.479e-10	3	2.493e-10	F (3, 20) = 99.47	P<0.0001
	Residual (within columns)	5.012e-11	20	2.506e-12
	Total	7.98e-10	23
Multiple Comparisons	Tukey's multiple comparisons test	Mean Diff.	95.00% CI of diff.	Below threshold?	Summary	Adjusted P value
	VH Sham vs. VH SW	7.5e-07	-1.808e-006 to 3.308e-006	No	ns	0.8441
	VH Sham vs. AMX Sham	-1.216e-05	-1.472e-005 to -9.602e-006	Yes	****	<0.0001
	VH Sham vs. AMX SW	-8.917e-06	-1.147e-005 to -6.358e-006	Yes	****	<0.0001
	VH SW vs. AMX Sham	-1.291e-05	-1.547e-005 to -1.035e-005	Yes	****	<0.0001
	VH SW vs. AMX SW	-9.667e-06	-1.222e-005 to -7.108e-006	Yes	****	<0.0001
	AMX Sham vs. AMX SW	3.243e-06	6.852e-007 to 5.802e-006	Yes	**	0.01
